# Supplementary figures and images for: Preparation of a silver nanoparticle-based dual-functional sensor using a complexation–reduction method
Source: Royal Society of Chemistry journal article supplement (doi:10.1039/c4cp05012f), 2015-01-01

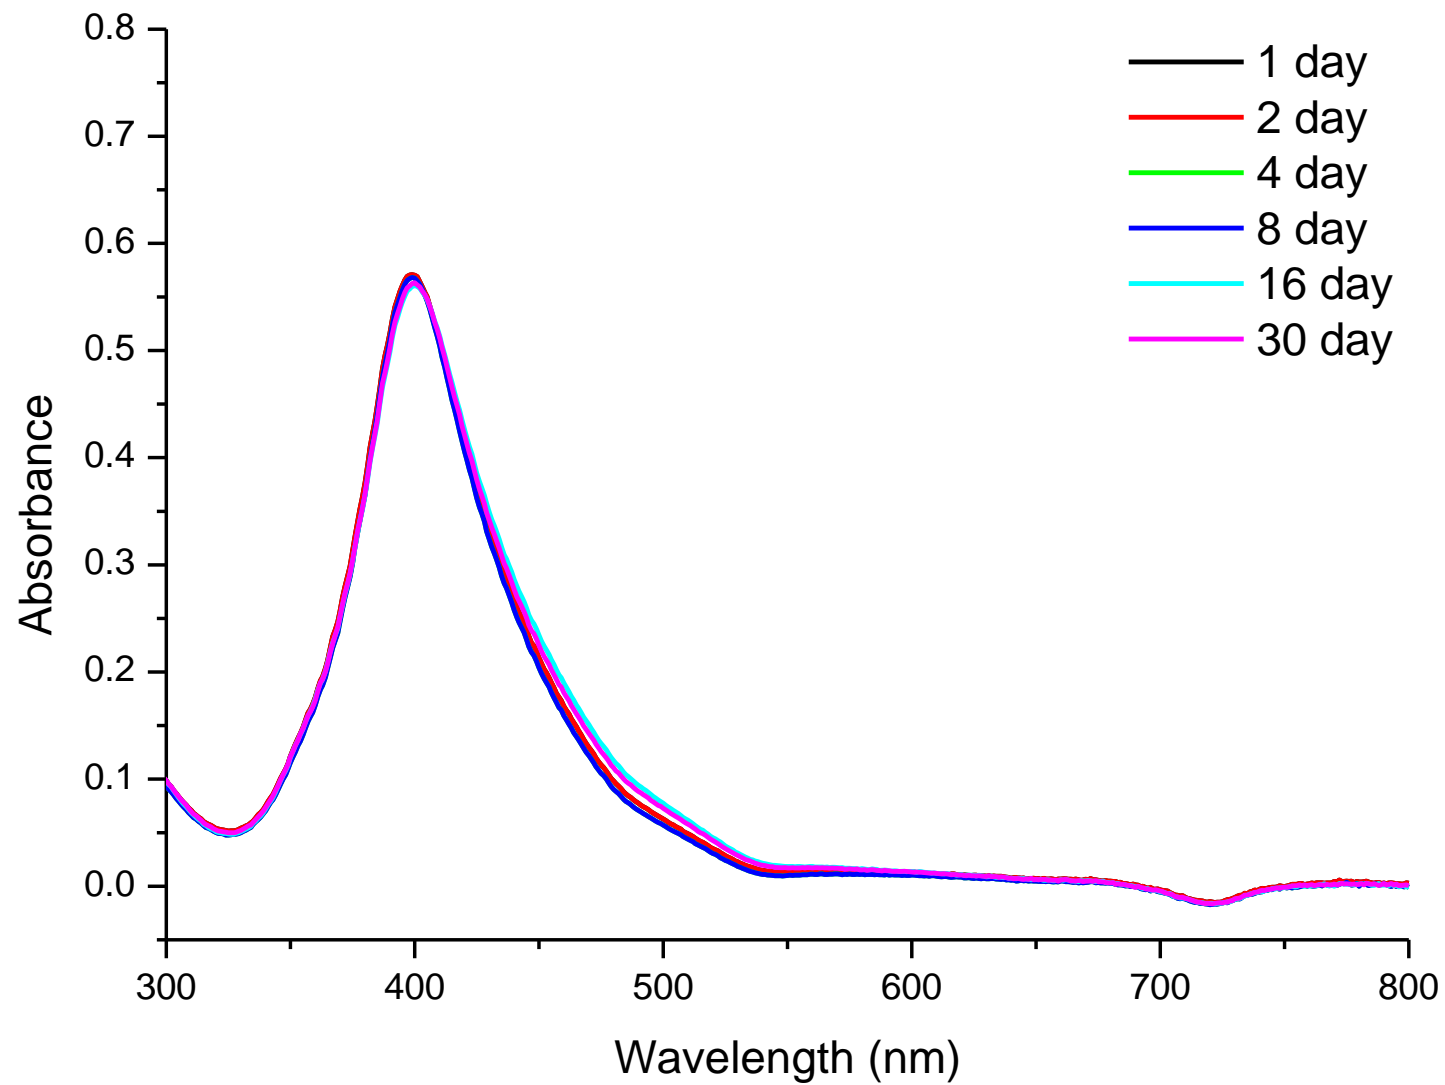

Fig. S1A

Supplement: c4cp05012f1.pdf [file c4cp05012f1.pdf]

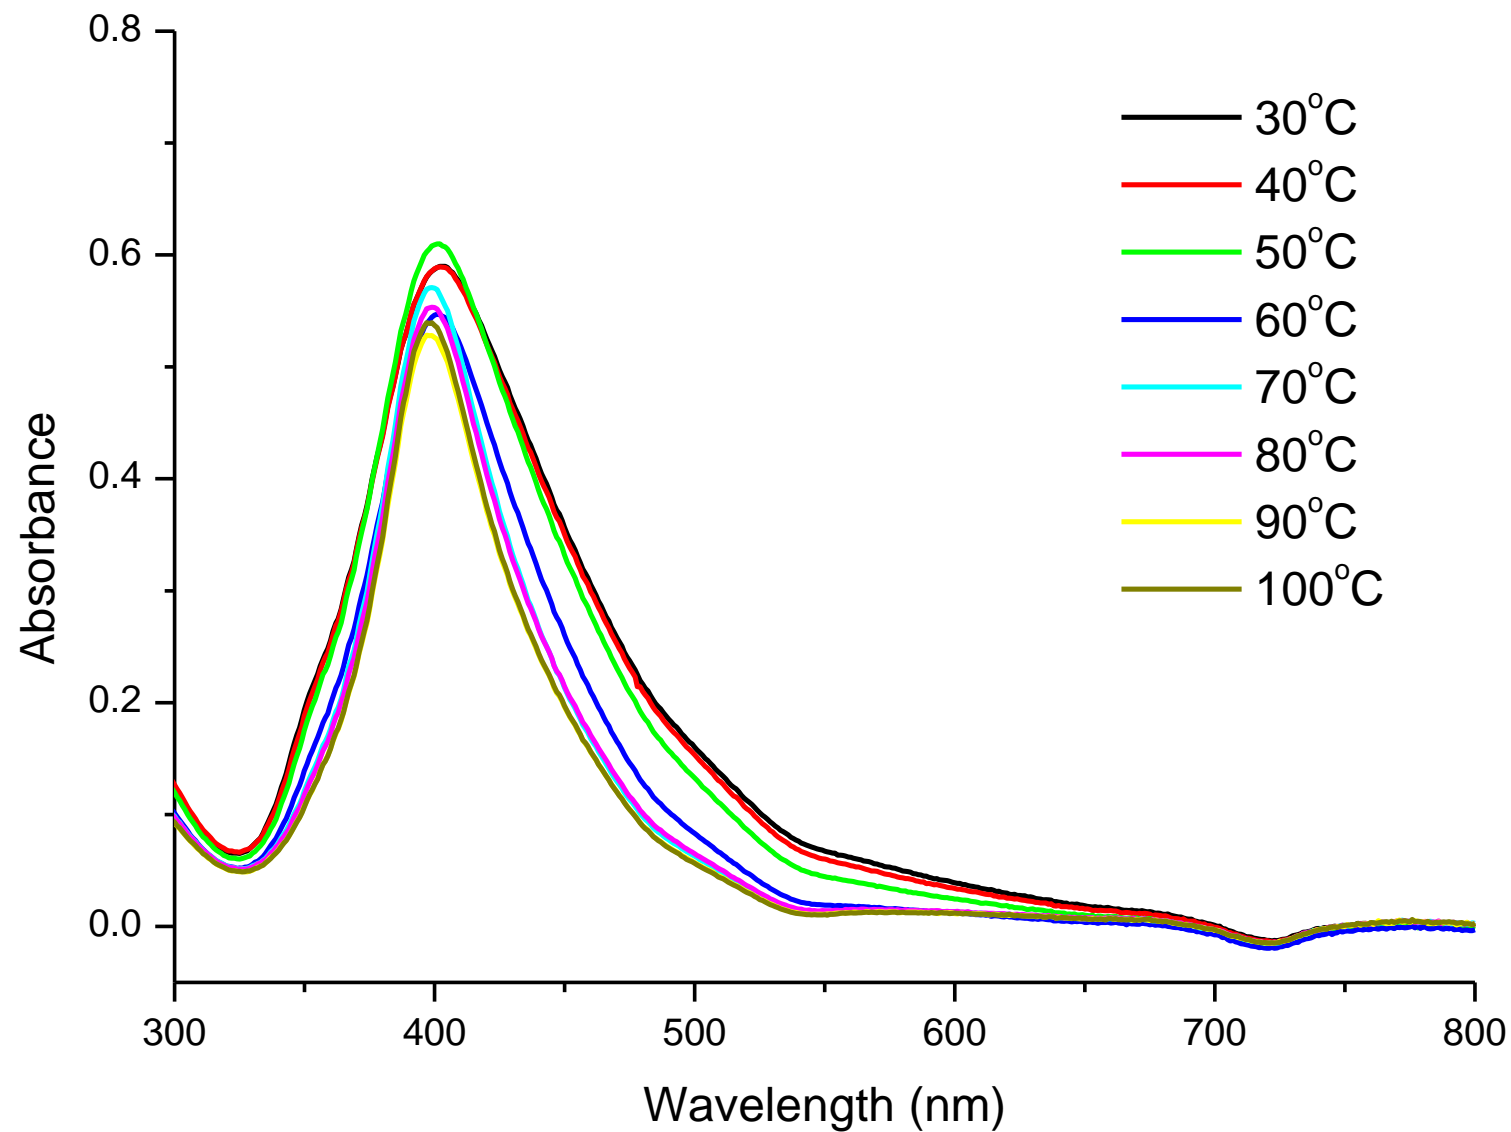

Fig. S4A

Supplement: c4cp05012f10.pdf [file c4cp05012f10.pdf]

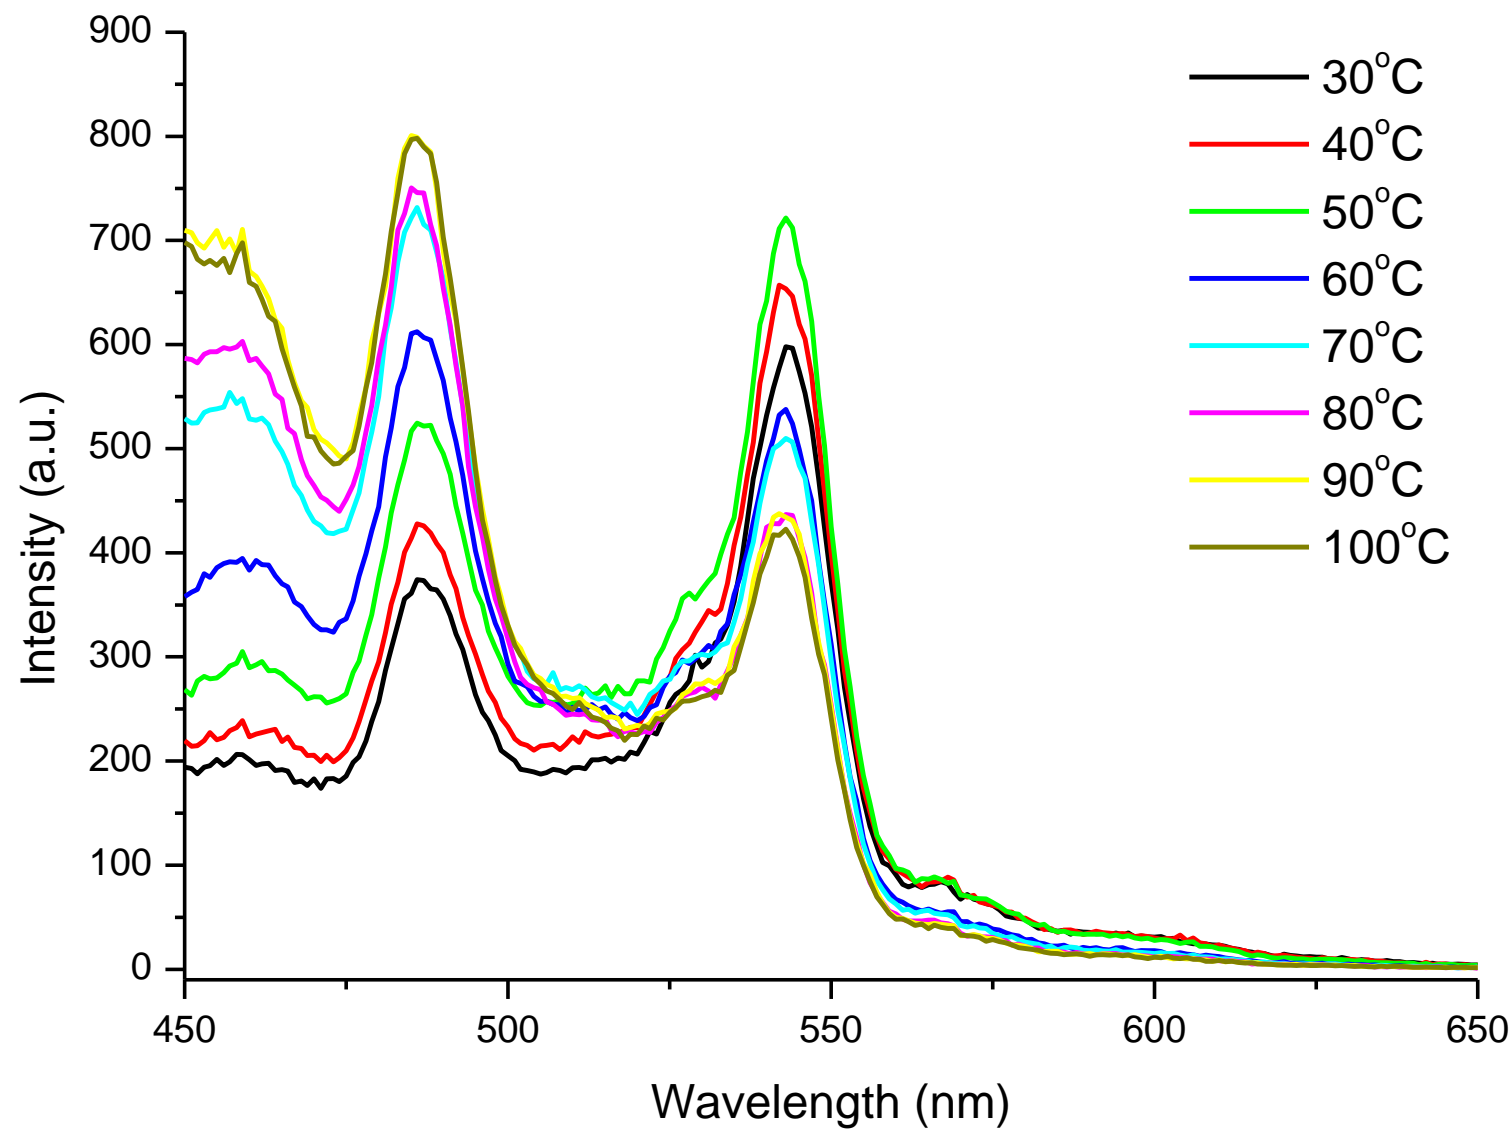

Fig. S4B

Supplement: c4cp05012f11.pdf [file c4cp05012f11.pdf]

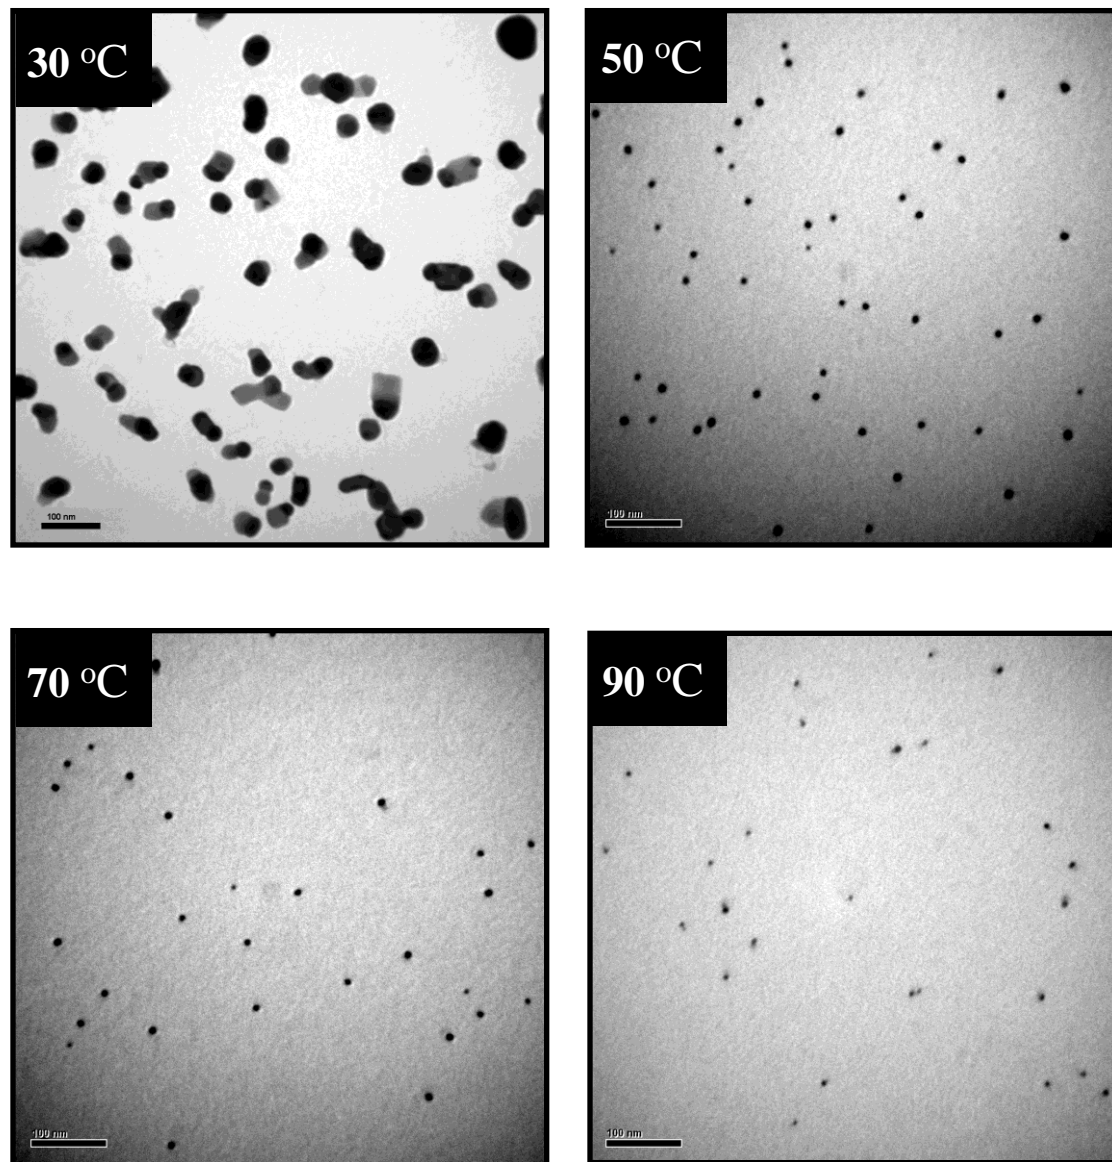

Fig. S4C

Supplement: c4cp05012f12.pdf [file c4cp05012f12.pdf]

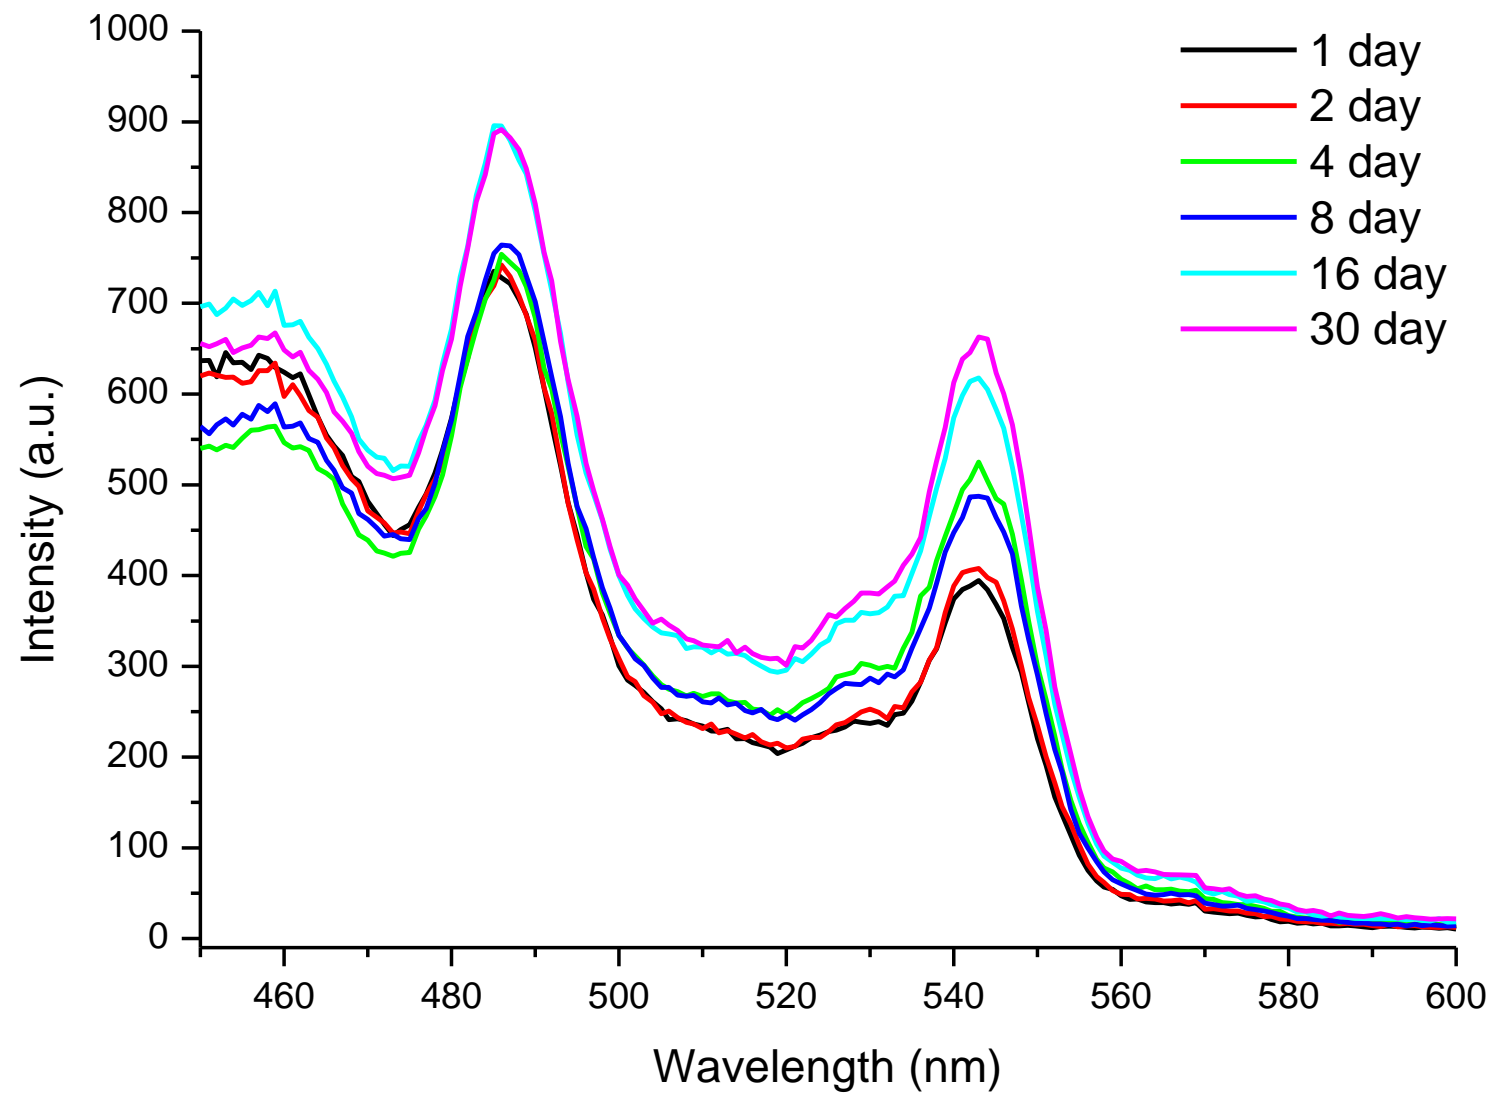

Fig. S1B

Supplement: c4cp05012f2.pdf [file c4cp05012f2.pdf]

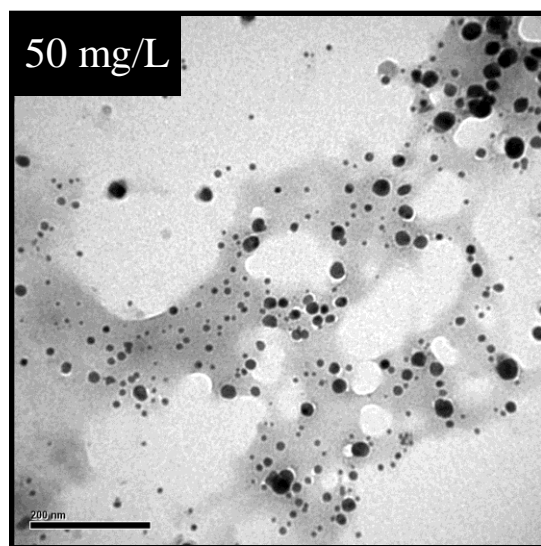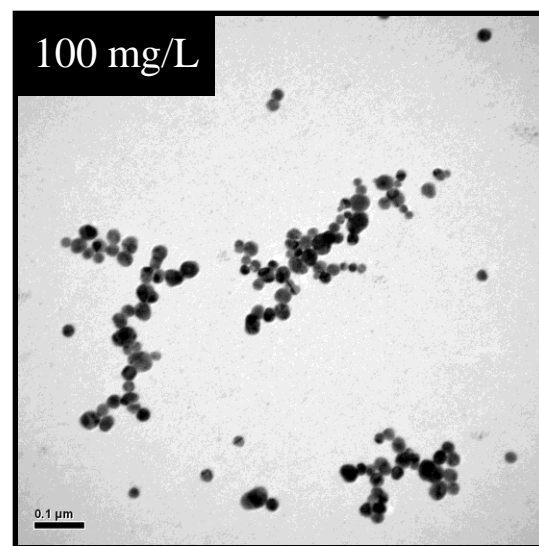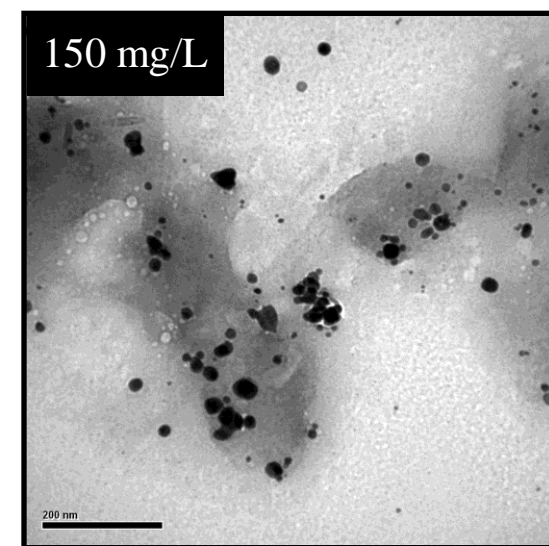

Fig. S2A

Supplement: c4cp05012f3.pdf [file c4cp05012f3.pdf]

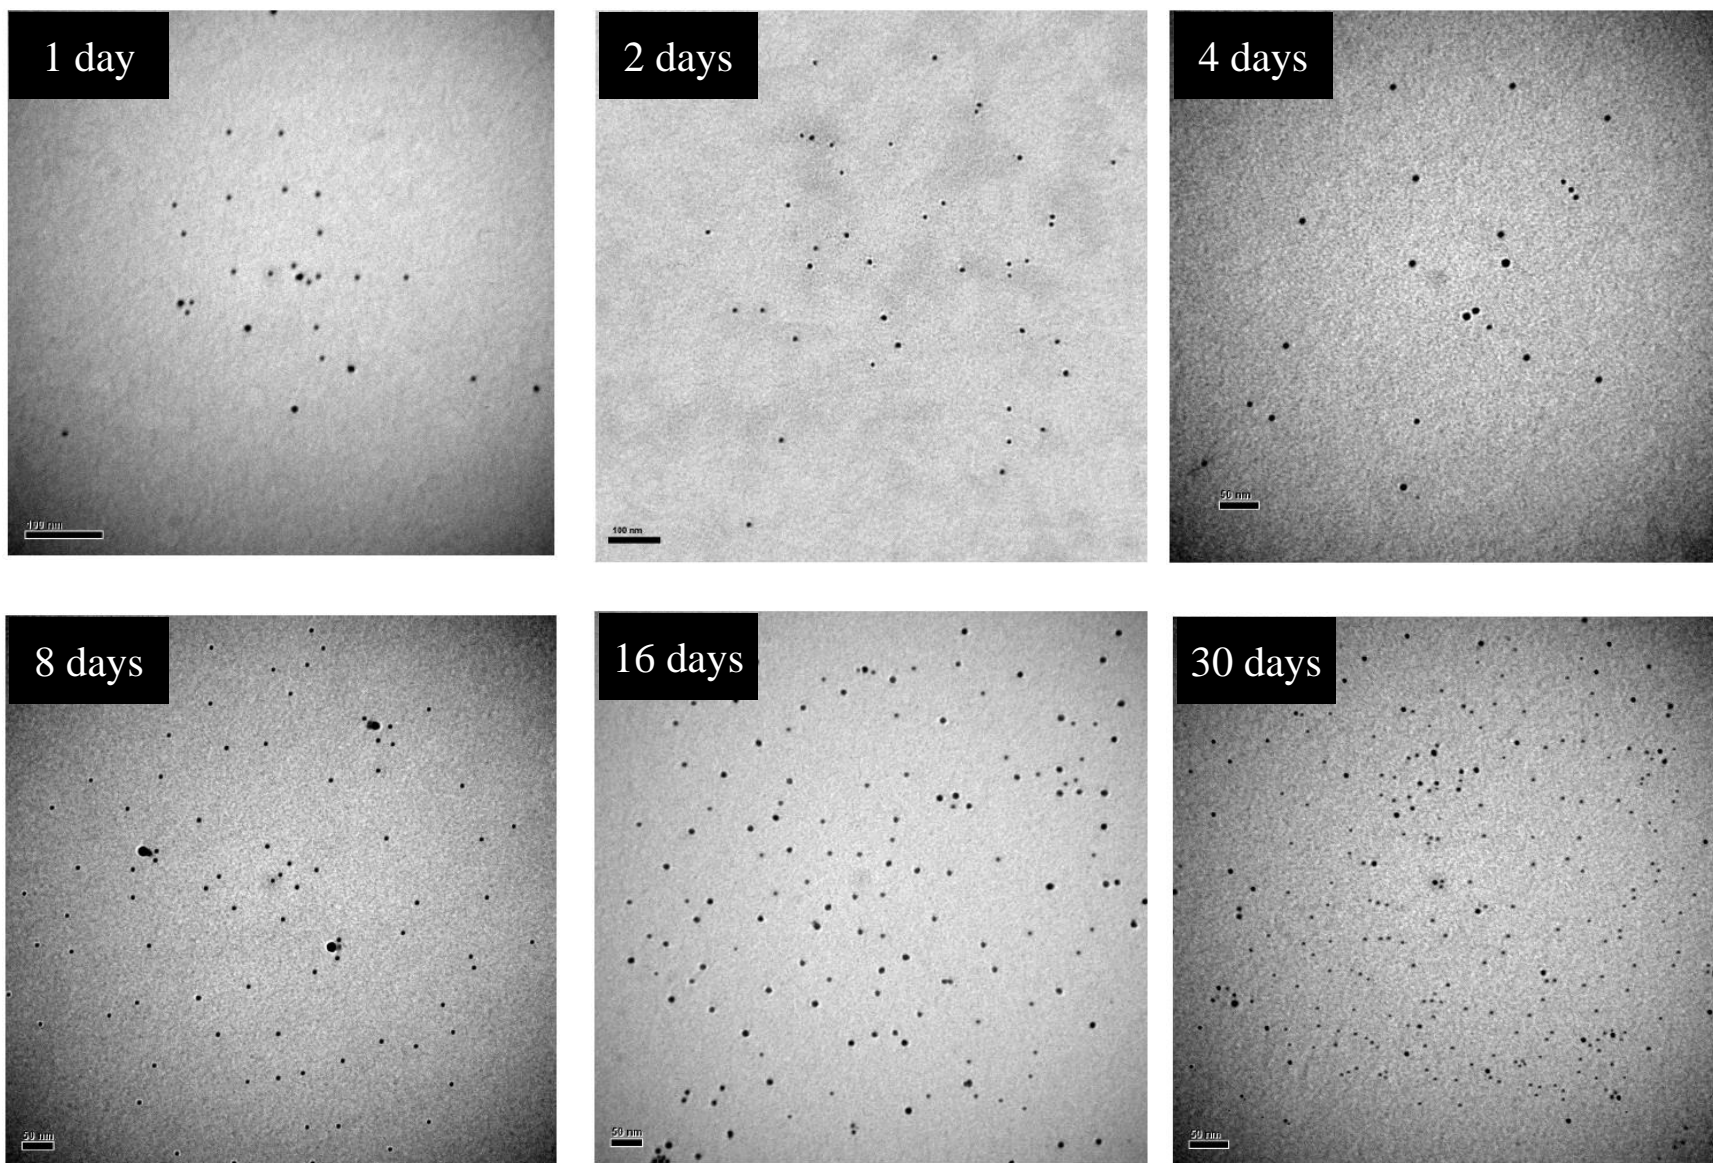

Fig. S2B

Supplement: c4cp05012f4.pdf [file c4cp05012f4.pdf]

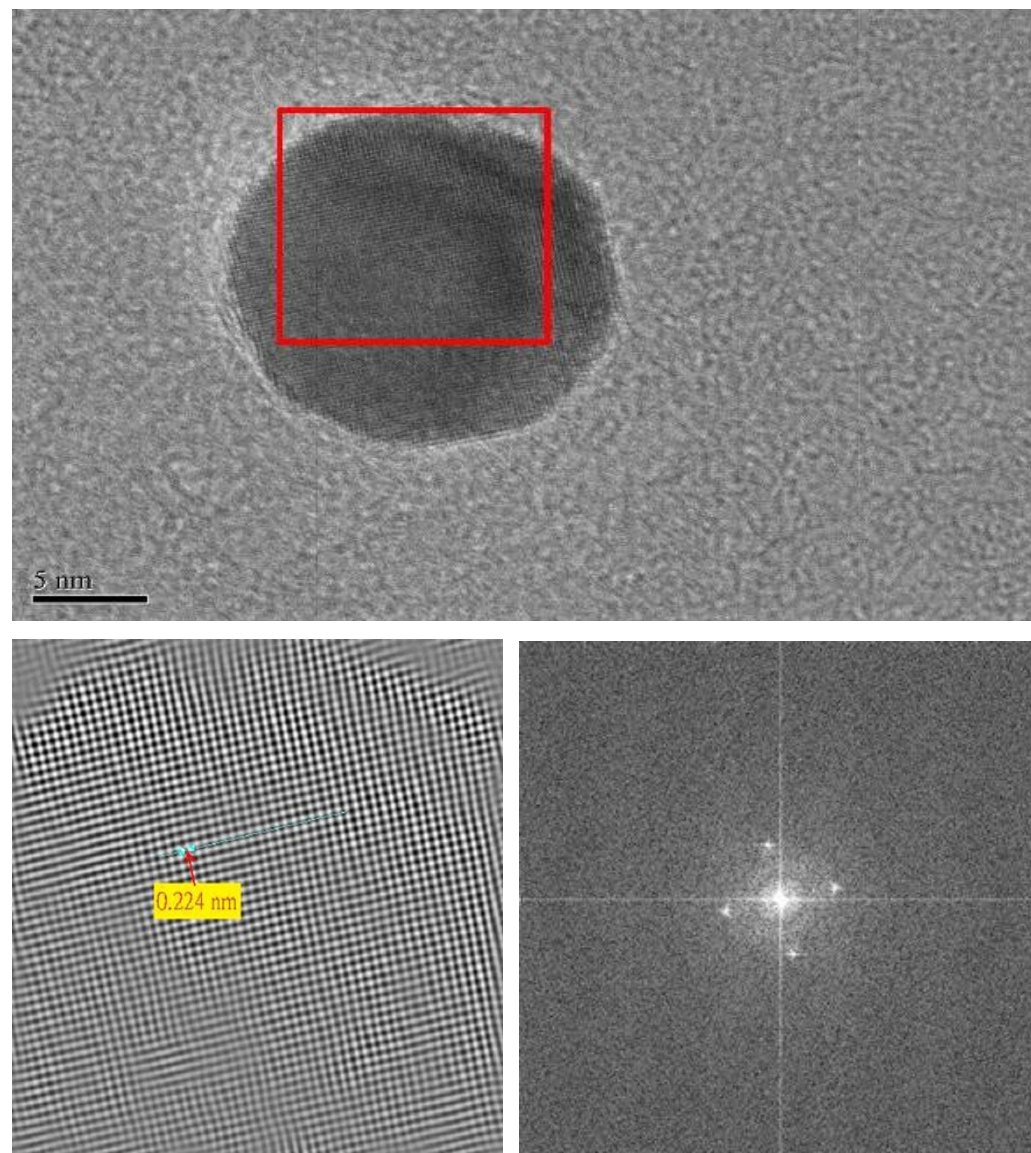

Fig. S2C

Supplement: c4cp05012f5.pdf [file c4cp05012f5.pdf]

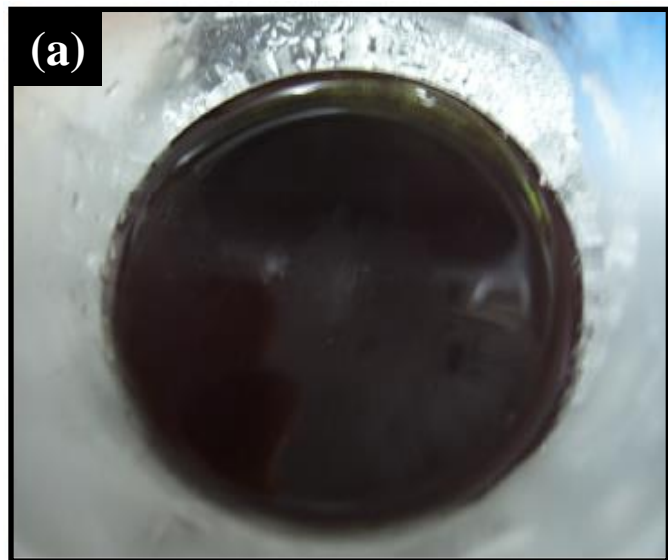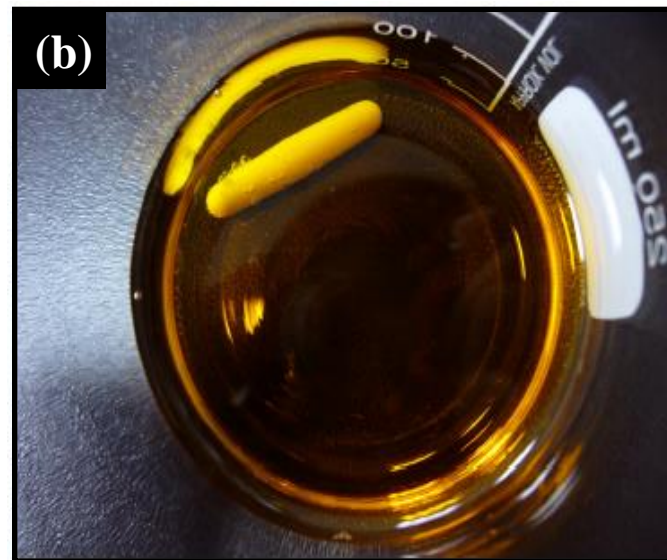

Fig. S3A

Supplement: c4cp05012f6.pdf [file c4cp05012f6.pdf]

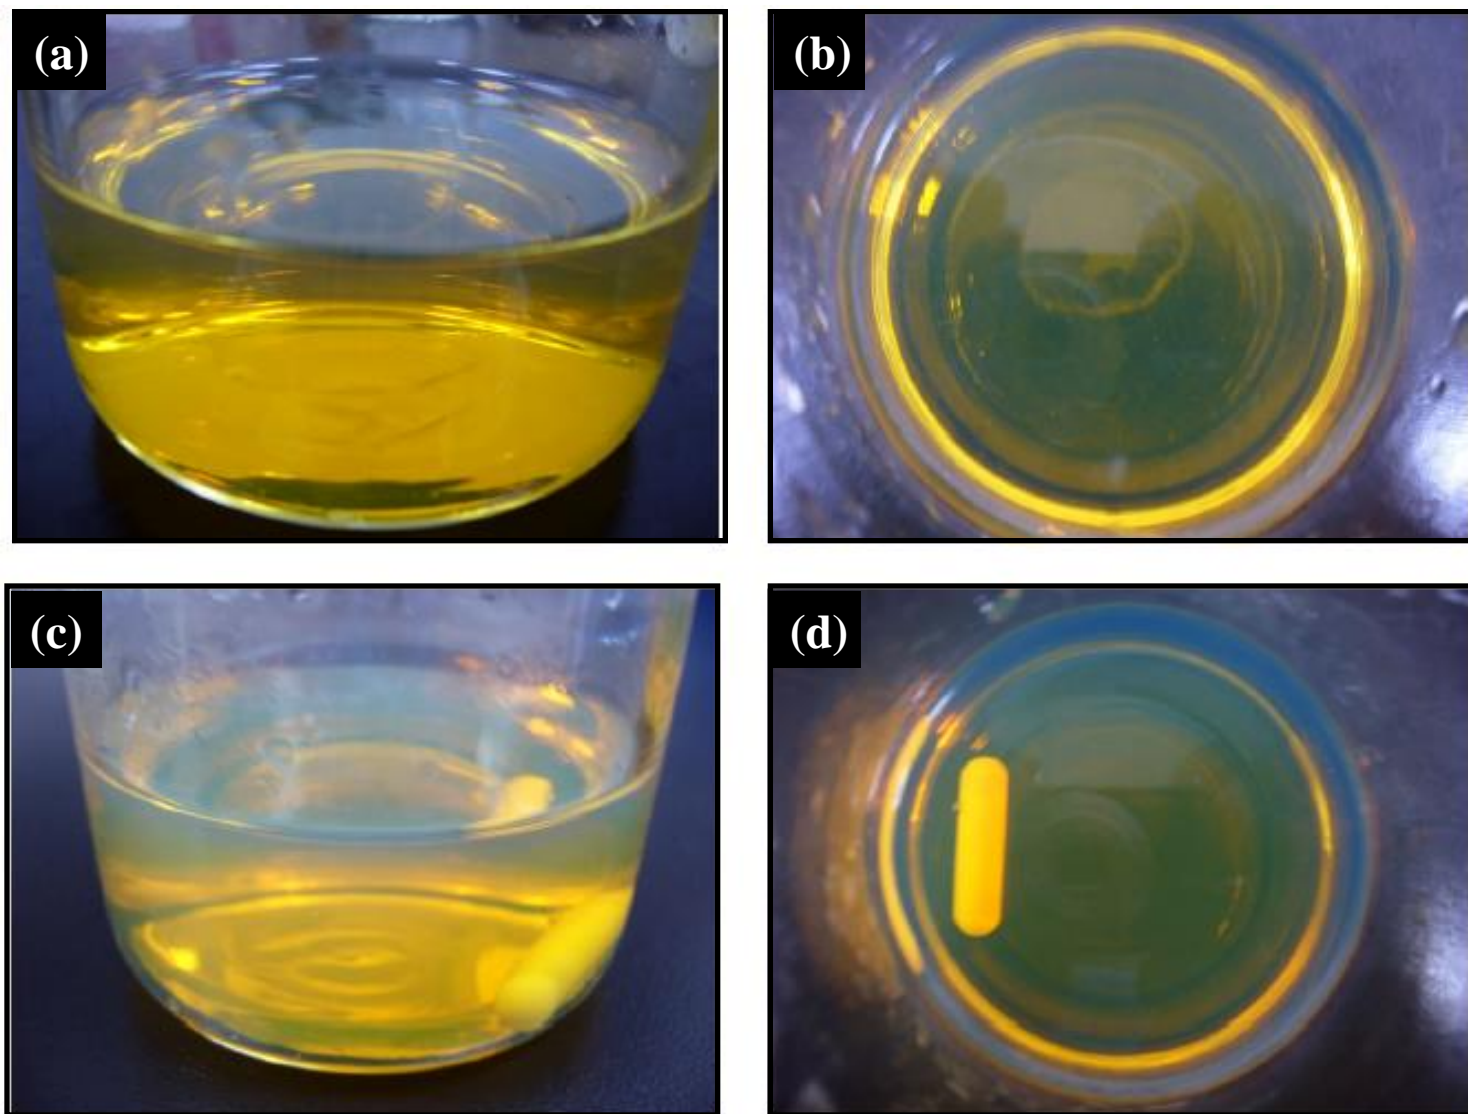

Fig. S3B

Supplement: c4cp05012f7.pdf [file c4cp05012f7.pdf]

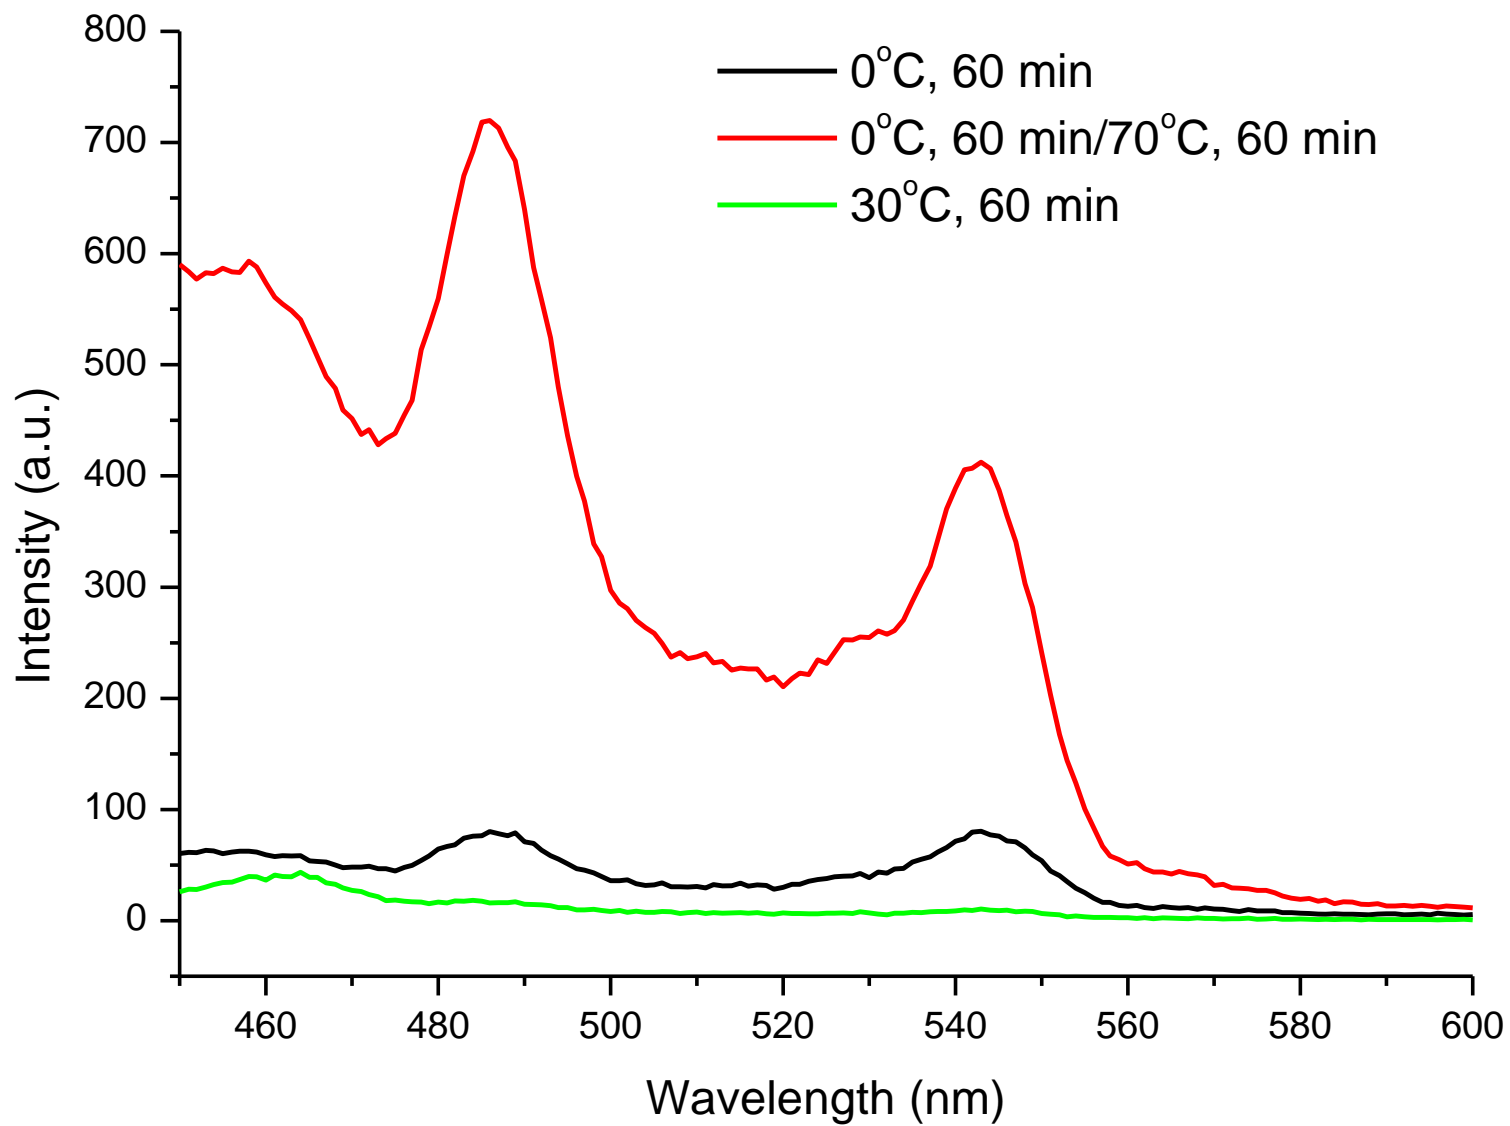

Fig. S3C

Supplement: c4cp05012f8.pdf [file c4cp05012f8.pdf]

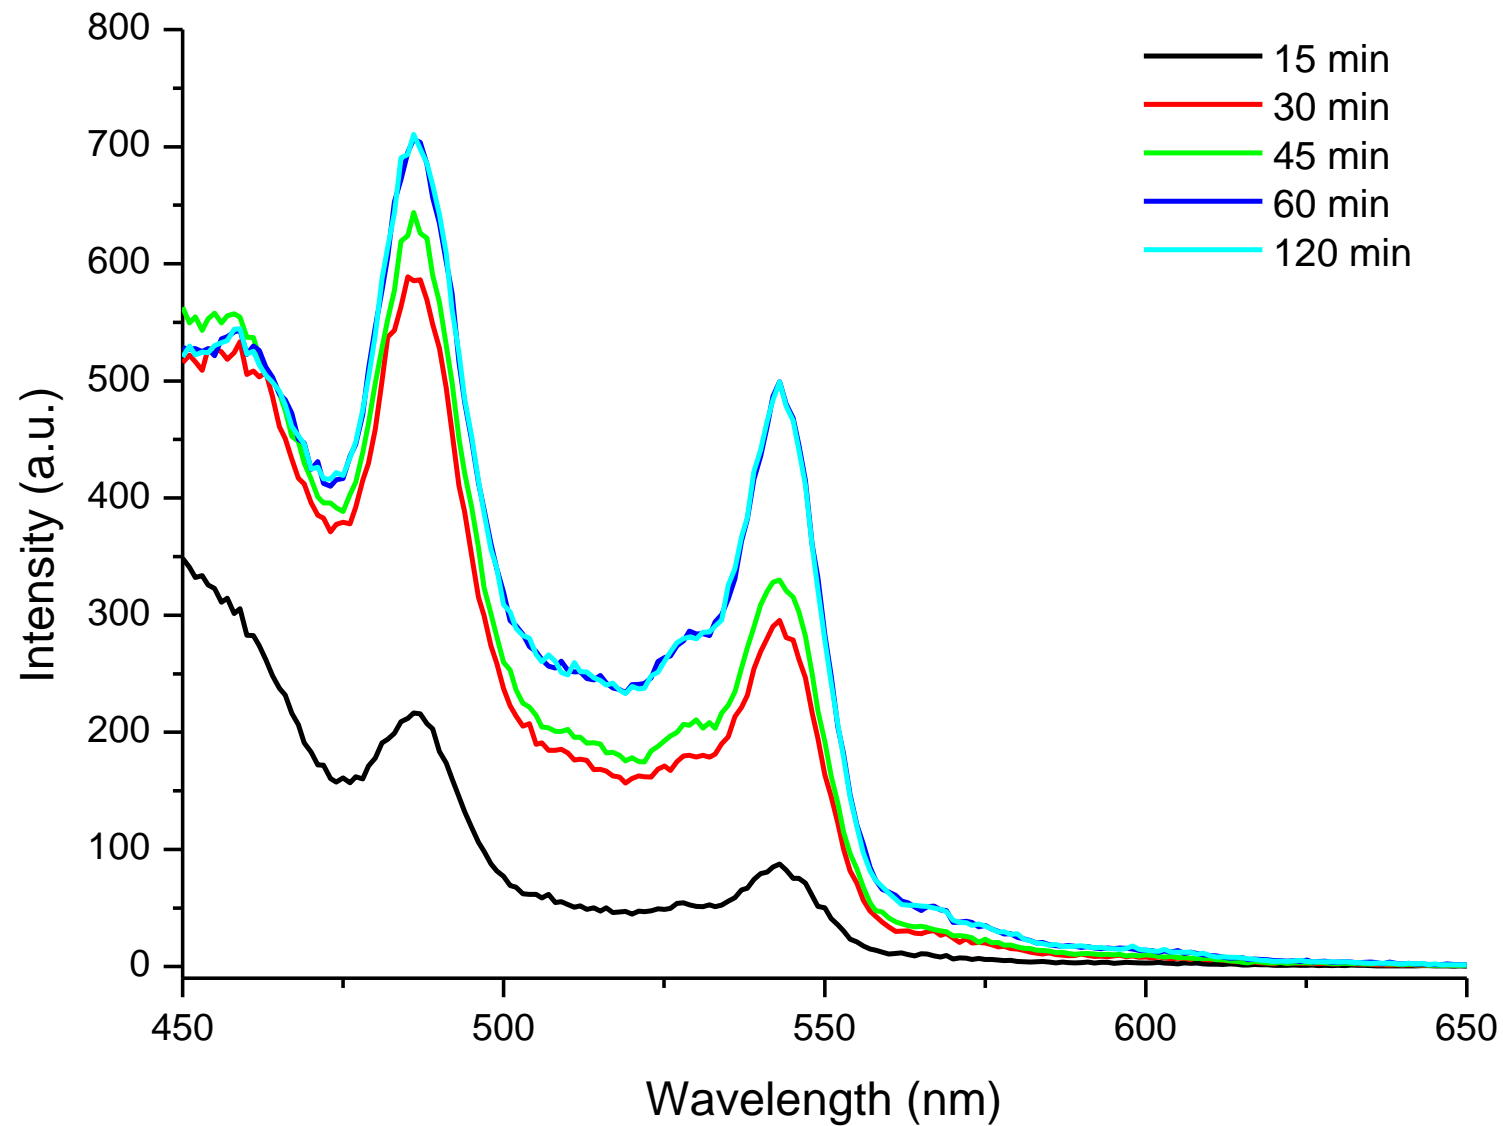

Fig. S3D

Supplement: c4cp05012f9.pdf [file c4cp05012f9.pdf]
